# Supplementary material for: Planar Asymmetries in the C. elegans Embryo Emerge by Differential Retention of aPARs at Cell-Cell Contacts
Source: Front Cell Dev Biol. 2019 Sep 27;7:209. doi: 10.3389/fcell.2019.00209 (PMC6776615; doi:10.3389/fcell.2019.00209)
Supplement: Supplementary file 2 [file Table_1.XLSX]

## Sheet: WT vs RNAis summary
	Apical acummulation of NMY-2	Ventral movement of NMY-2 domain	Dissipation and ventral movement of NMY-2 domain
WT	230±8 s	105±12.5 s	112.5±5.5 s
cdc-42 RNAi	262±8.19 s	61±4.36 s	177±19.05 s
ect-2 RNAi	229.5±20.29 s	45±3.46 s	199±29.51 s
pac-1(xn6)	241.5±24.20 s	100±13.45 s	190±19.08 s
	Apical acummulation of NMY-2	Dissipation of NMY-2 domain	Ventral movement
gsk-3 RNAi	259±29 s	145.5±39 s	196±48 s
